# Supplementary material for: A cobalt-borate nanosheet array: an efficient and durable non-noble-metal electrocatalyst for water oxidation at near neutral pH
Source: Royal Society of Chemistry journal article supplement (doi:10.1039/c7ta00982h), 2017-01-01
Supplement: c7ta00982h1.pdf [file c7ta00982h1.pdf]

## Electronic Supplementary Information

### Experimental Section

**Materials:** Ti mesh was provided by Hangxu Filters Flag Store, Hengshui, Hebei. and  $K_2B_4O_7 \cdot 4H_2O$ , NaOH,  $RuCl_3 \cdot 3H_2O$ , and  $Co(NO_3)_2 \cdot 6H_2O$  were purchased from Aladdin Ltd. (Shanghai, China). Nafion (5 wt%) was purchased from Sigma-Aldrich. All the reagents were used as received. The water used throughout all experiments was purified through a Millipore system.

**Preparation of  $\alpha$ -Co(OH)<sub>2</sub>/Ti:** Before electrodeposition, Ti mesh was firstly washed with HCl, ethanol, and water several times. The electrodeposition solution contained 0.05 M  $Co(NO_3)_2 \cdot 6H_2O$ . The deposition was performed in a three-electrode system by a CHI 660E electrochemical analyzer (CH Instruments, Inc. Shanghai), using a graphite plate as the counter electrode, Hg/Hg<sub>2</sub>Cl<sub>2</sub> (SCE) as the reference electrode, and the cleaned Ti mesh (1 × 4 cm<sup>2</sup>) as the working electrode. The experiment was performed at room temperature (25 °C). The electrodeposition of  $\alpha$ -Co(OH)<sub>2</sub> nanosheets by cyclic voltammetry (CV) was performed within the potential window from -1.2 V to -0.8 V vs. SCE with a scan rate of 50 mV • s<sup>-1</sup>. After deposition for 50 scan cycles, the as-prepared electrode was rinsed first with deionized water, ethanol for several times and then dried at 60 °C for 12 h in vacuum oven. The sample was annealed at 350 °C in air for 2 h to obtain the Co<sub>3</sub>O<sub>4</sub> nanosheets array.

**Preparation of Co-Bi/Ti:** To obtain Co-Bi/Ti, the  $\alpha$ -Co(OH)<sub>2</sub>/Ti electrode as the working electrode performed by cyclic voltammetry in 0.1 M KBi (pH 9.2) until the current density levelled off, with the graphite plate as the counter electrode and SCE as the reference electrode.

**Electrochemical measurements:** Electrochemical measurements were performed with a CHI 660E electrochemical analyzer (CH Instruments, Inc., Shanghai) in a conventional three-electrode system. Graphite plate, SCE, and Co-Bi/Ti were used as counter, reference and working electrodes, respectively. Overpotentials ( $\eta$ ) were

calculated by the following equation:  $\eta = E \text{ (RHE)} - 1.23 \text{ V}$ , where  $E \text{ (RHE)} = E \text{ (SCE)} + (0.242 + 0.059 \text{ pH}) \text{ V}$ . Polarization curves were obtained using linear sweep voltammetry with a scan rate of  $2 \text{ mVs}^{-1}$  in  $0.1\text{M}$  KBi electrolyte. All experiments were carried out at room temperature ( $298 \text{ K}$ ).

**Characterizations:** Powder X-ray powder diffraction (XRD) data of the samples were collected on Bruker D8 ADVANCE Diffractometer ( $\lambda=1.5418 \text{ \AA}$ ). The scanning electron microscopy (SEM) measurements were performed on a XL30 ESEM FEG scanning electron microscope at an accelerating voltage of  $20 \text{ kV}$ . Transmission electron microscopy (TEM) measurements were performed on a HITACHI H-8100 electron microscopy (Hitachi, Tokyo, Japan) with an accelerating voltage of  $200 \text{ kV}$ . X-ray photoelectron spectroscopy (XPS) measurements were collected with a Thermal ESCALAB 250 spectrometer using an Al  $K\alpha$  X-ray source ( $1486.6 \text{ eV}$  photons).

**Double layer capacitance ( $C_{dl}$ ) measurements:** To measure the electrochemical capacitance, the potential was swept between  $1.13$  to  $1.23 \text{ V}$  vs. RHE at different scan rates ( $60, 80, 100, 120, 140, 160,$  and  $180 \text{ mV s}^{-1}$ ) with an assumption of double layer charging in the potential range. The capacitive currents at  $1.19 \text{ V}$  vs. RHE were measured and plotted as a function of scan rate. A linear fit determined the double layer capacitance to be  $122 \text{ \mu F cm}^{-2}$ .

**Turn over frequency (TOF) calculations:** To compare the activity of Co-Bi with other non-noble-metal catalysts, we make a rough estimation of TOF for each active site using the following equation:

$$\text{TOF} = \text{JA}/4\text{F m}$$

Where  $J$  is current density ( $\text{A cm}^{-2}$ ) at defined overpotential during the LSV measurement in  $0.1 \text{ M K-Bi}$ ;  $A$  is the geometric area of the electrode;  $4$  indicates the mole of electrons consumed for evolving one mole of  $\text{O}_2$  from water;  $F$  is the Faradic constant ( $96485 \text{ C mol}^{-1}$ );  $m$  is the number of active sites (mol), which can be extracted from the linear relationship between the oxidation peak current and scan rate using the following equation:

$$\text{Slope} = n^2\text{F}^2\text{A}\Gamma_0/4\text{RT}$$

where  $n$  is the number of electrons transferred;  $F$  is the Faradic constant;  $A$  is the surface area of the electrode;  $\Gamma_0$  is the surface concentration of active sites ( $\text{mol cm}^{-2}$ );  $R$  and  $T$  are the ideal gas constant and the absolute temperature, respectively.

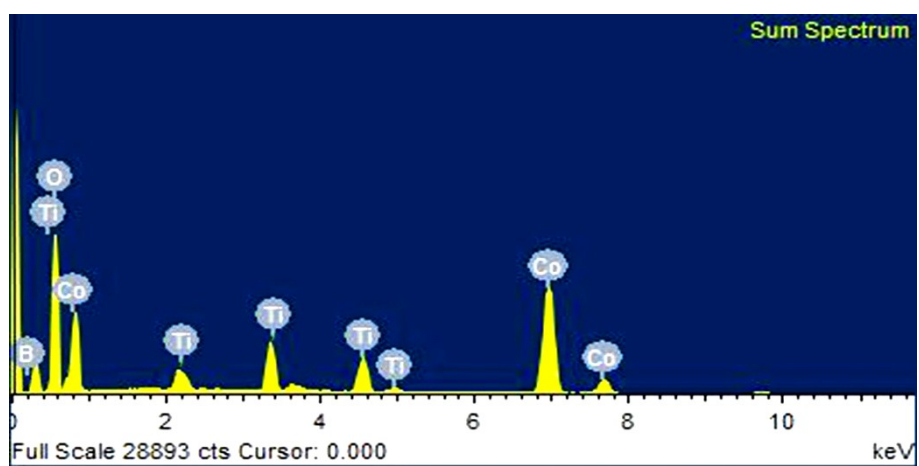

**Fig. S1** EDX spectrum of Co-Bi/Ti.

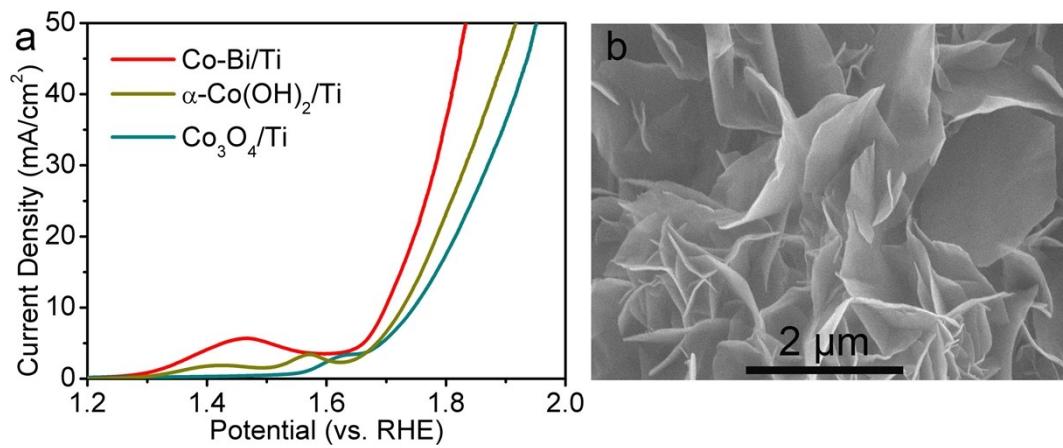

**Fig. S2** (a) LSV curves of Co-Bi/Ti,  $\alpha$ -Co(OH)<sub>2</sub>/Ti, and Co<sub>3</sub>O<sub>4</sub>/Ti for OER in 0.1M KBi. (b) SEM image of Co<sub>3</sub>O<sub>4</sub>/Ti.

**Table S1** Comparison of OER performance for Co-Bi/Ti with other non-noble-metal OER electrocatalysts in neutral or near-neutral media.

| Catalyst                              | $j$ (mA cm <sup>-2</sup> ) | $\eta$ (mV) | Electrolyte | Ref.      |
|---------------------------------------|----------------------------|-------------|-------------|-----------|
| Co-Bi/Ti                              | 5                          | 430         | 0.1 M K-Bi  | This work |
|                                       | 10                         | 469         | 0.1 M K-Bi  |           |
| Co-Bi NS/G                            | 10                         | ~490        | 0.1 M PBS   | 1         |
| Co-Pi/ITO                             | 1                          | 410         | 0.1 M PBS   | 2         |
| Co-Pi/ITO                             | 1                          | 483         | 0.1 M PBS   | 3         |
| Co(PO <sub>3</sub> ) <sub>2</sub>     | 10                         | 590         | 0.1 M PBS   | 4         |
| Co(OH) <sub>2</sub>                   | 1                          | 710         | 0.1 M PBS   | 5         |
| CoHCF                                 | 1                          | 580         | 0.05 M PBS  | 6         |
| Co-Bi/FTO                             | 1                          | 390         | 1 M K-Bi    | 7         |
| Co <sub>3</sub> O <sub>4</sub> /SWNTS | 5                          | ~700        | 0.1M PBS    | 8         |
| Ni-Bi film/ITO                        | 1                          | ~425        | 0.1 M Bi    | 9         |
| Ni-Bi film/FTO                        | 0.6                        | 618         | 0.1 M Na-Bi | 10        |
| NiO <sub>x</sub> -en/FTO              | 1                          | ~510        | 0.6 M Na-Bi | 11        |
| NiO <sub>x</sub> -Bi                  | 1                          | ~650        | 0.5 M K-Bi  | 12        |
| NiO <sub>x</sub> -Fe-Bi               | 5                          | ~552        |             |           |
| Fe-based film/ITO                     | 10                         | 600         | 0.5 M Na-Bi | 13        |
| CuO/FTO                               | 1                          | ~550        | 0.1 M K-Bi  | 14        |
| Cu-Bi/FTO                             | 1                          | ~530        | 0.2 M Na-Bi | 15        |

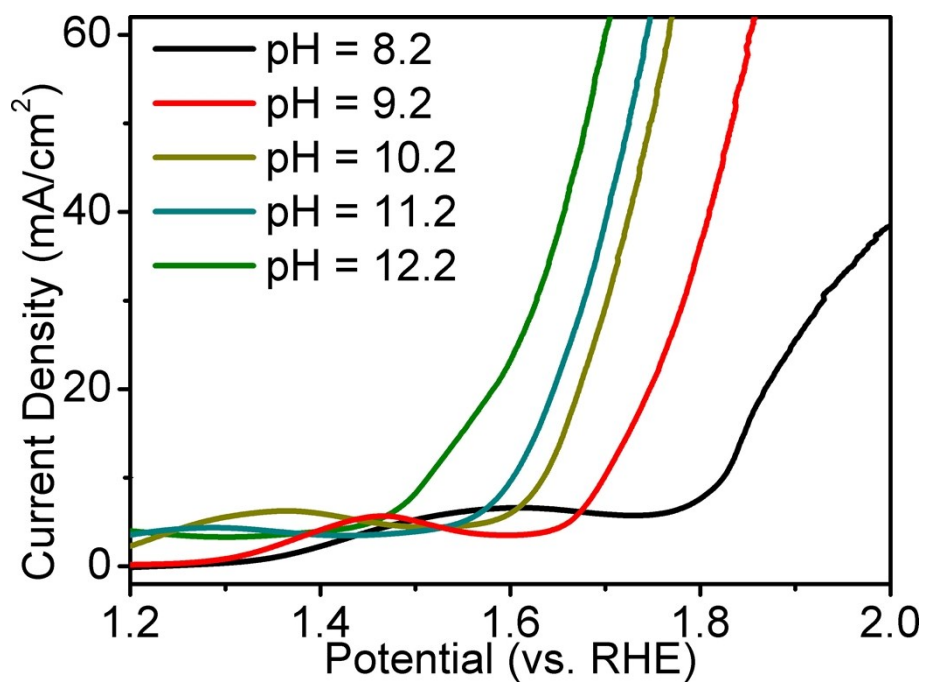

**Fig. S3** LSV curves of Co-Bi/Ti for OER in 0.1M K-Bi with different pH.

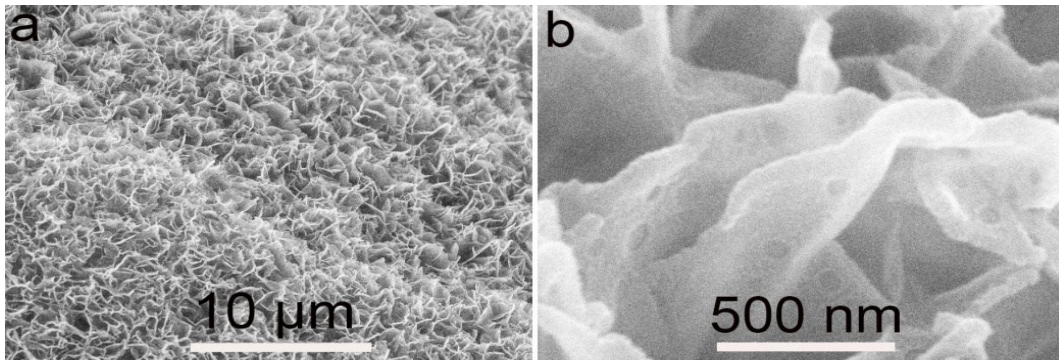

**Fig. S4** SEM images of post-OER Co-Bi/Ti.



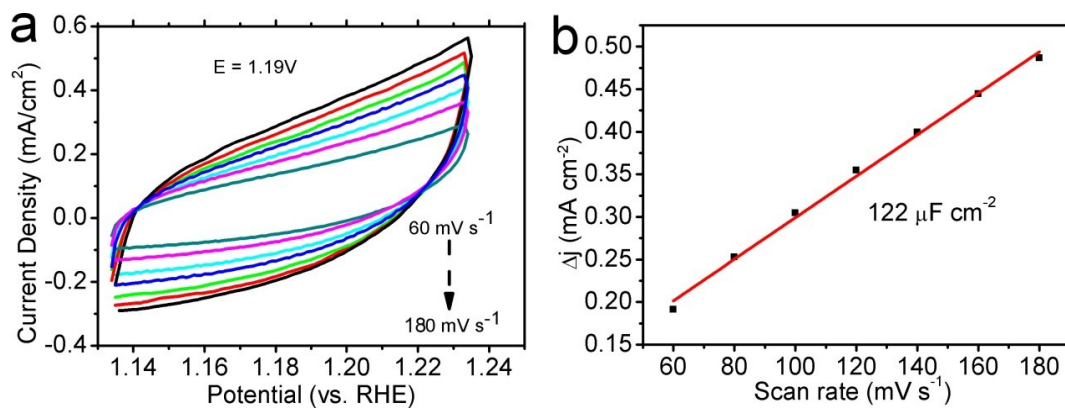

**Fig. S5** (a) Cyclic voltammograms for Co-Bi/Ti in the non-faradaic capacitance current range at scan rates of 60, 80, 100, 120, 140, 160, and 180 mV s<sup>-1</sup>. (b) Capacitive currents for Co-Bi/Ti as a function of scan rate.

## References

- 1 P. Chen, K. Xu, T. Zhou, Y. Tong, J. Wu, H. Cheng, X. Lu, H. Ding, C. Wu and Y. Xie, *Angew. Chem., Int. Ed.*, 2016, **55**, 2488-2492.
- 2 M. W. Kanan and D. G. Nocera, *Science*, 2008, **312**, 1072-1075.
- 3 Y. Surendranath, M. Dinca and D. G. Nocera, *J. Am. Chem. Soc.*, 2009, **131**, 2615-2620.
- 4 H. S. Ahnand and T. D. Tilley, *Adv. Funct. Mater.*, 2013, **23**, 227-233.
- 5 Y. Zhang, B. Cui, Z. Qin, H. Lin and J. Li, *Nanoscale*, 2013, **5**, 6826-6833.
- 6 S. Pintado, S. Goberna-Ferron, E. C. Escudero-Adan and J. R. Galán-Mascarós, *J. Am. Chem. Soc.*, 2013, **135**, 13270-13273.
- 7 A. J. Esswein, Y. Surendranath, S. Y. Reece and D. G. Nocera, *Energy Environ. Sci.*, 2011, **4**, 499-504.
- 8 J. Wu, Y. Xue, X. Yan, W. Yan, Q. Cheng and Y. Xie, *Nano Res.*, 2012, **5**, 521-530.
- 9 M. Dincă, Y. Surendranath and D. G. Nocera, *Proc. Natl. Acad. Sci. U.S.A.*, 2010, **107**, 10337-10341.
- 10 C. He, X. Wu and Z. He, *J. Phys. Chem. C.*, 2014, **118**, 4578-4584.
- 11 A. Singh, S. L. Y. Chang, R. K. Hocking, U. Bach, and L. Spiccia, *Energy Environ. Sci.*, 2013, **6**, 579-586.
- 12 A. M. Smith, L. Trotochaud, M. S. Burke and S. W. Boettcher, *Chem. Commun.*, 2015, **51**, 5261-5263
- 13 D. R. Chowdhury, L. Spiccia, S. S. Amritphale, A. Paul and A. Singh, *J. Mater. Chem. A*, 2016, **4**, 3655-3660.
- 14 X. Liu, S. Cui, Z. Sun and P. Du, *Electrochim. Acta*, 2015, **160**, 202-208.
- 15 F. Yu, F. Li, B. Zhang, H. Li and L. Sun, *ACS Catal.*, 2015, **5**, 627-630.
